# Supplementary material
Source: MDPI journal article supplement (https://www.mdpi.com/2218-0532/91/1/7)
Supplement: s1 [file s1 › scipharm-2155674-supplementary.pdf]

## Supplementary Materials

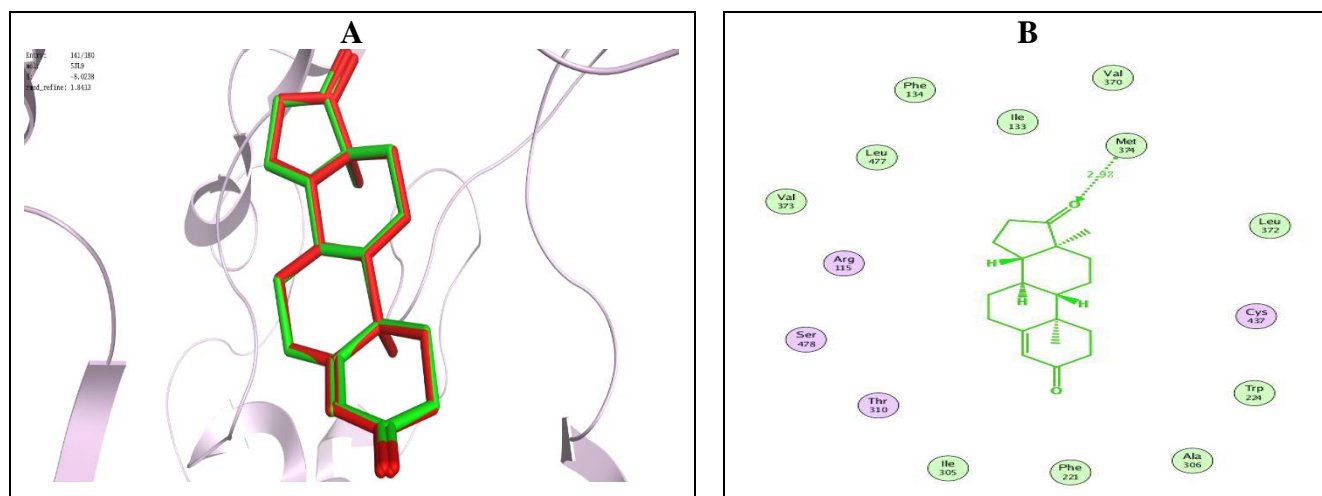

**Figure S1:** (A) 3D diagram and (B) 2D overlay disclosing the superimposition of the native co-crystallized ligand (green), and the redocked co-crystallized ligand (Red) at aromatase enzyme with RMSD value of 1.84 Å for docking program validation.







| Aromatase |                                                                                     |                                                                                      |                                                                                       |
|-----------|-------------------------------------------------------------------------------------|--------------------------------------------------------------------------------------|---------------------------------------------------------------------------------------|
| Comp no.  | 2D                                                                                  | 3D                                                                                   | 3D protein                                                                            |
| 1         | 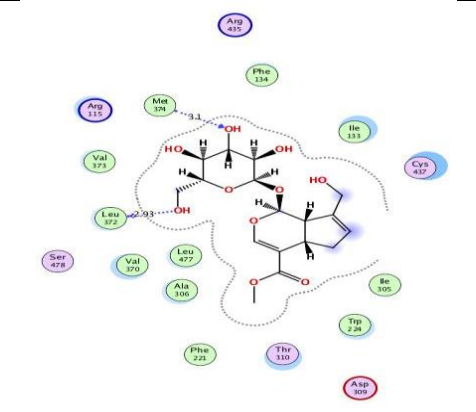   | 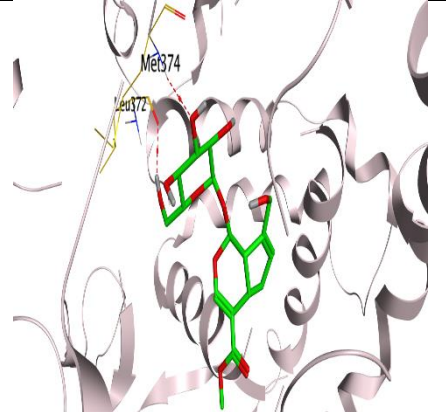   | 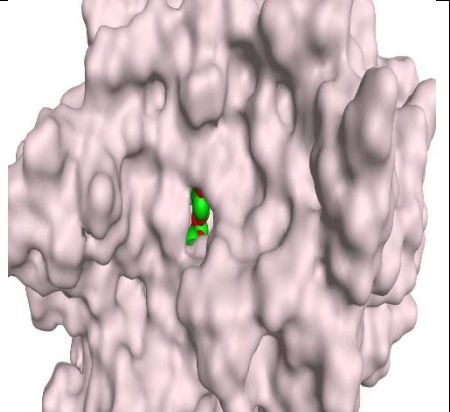   |
| 2         | 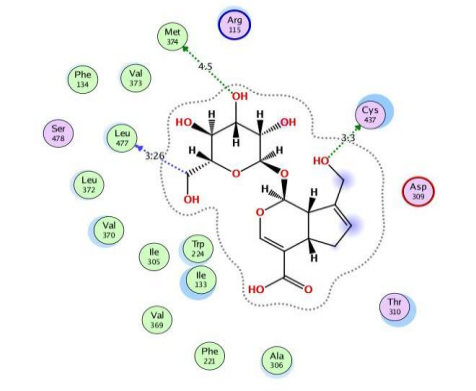  | 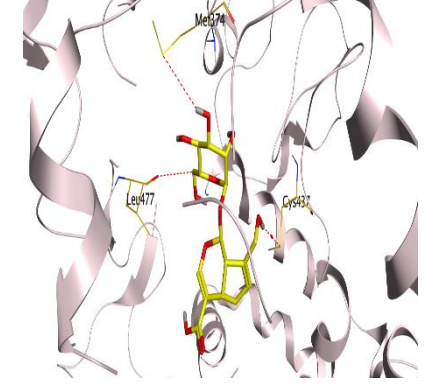  | 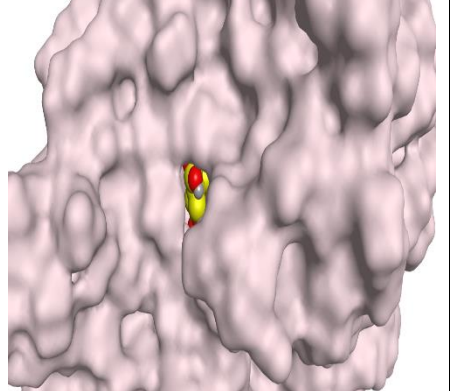  |
| 3         | 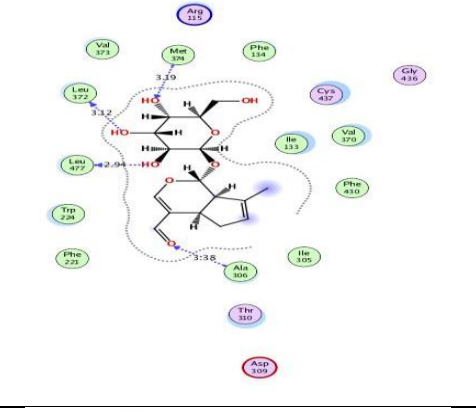 | 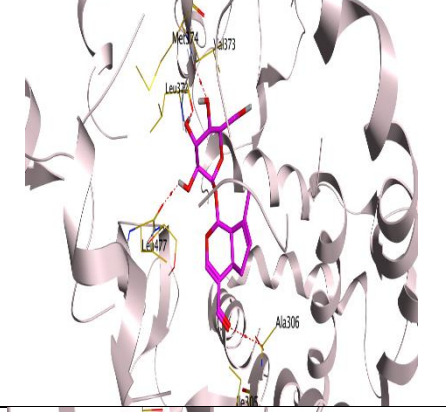 | 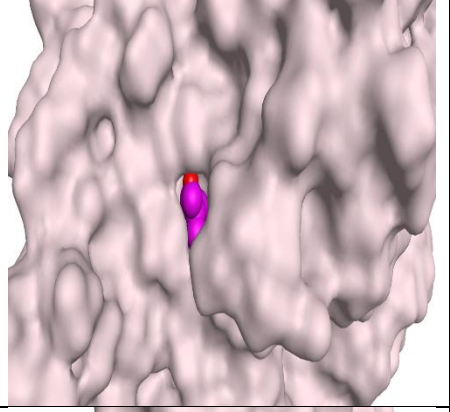 |
| 4         | 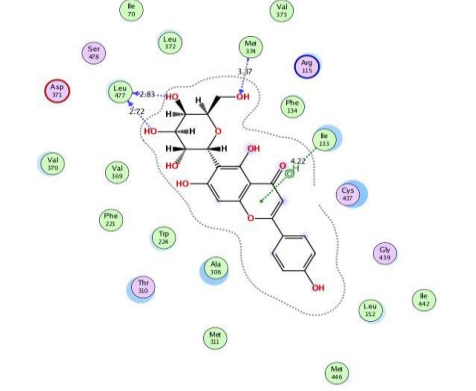 | 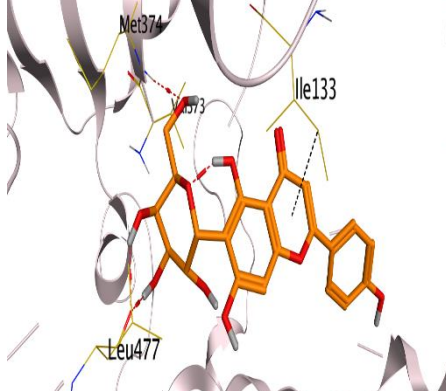 | 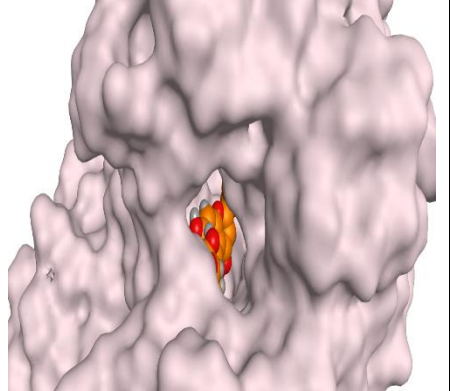 |

|                        |  |  |  |
|------------------------|--|--|--|
| <p>5</p>               |  |  |  |
| <p>6</p>               |  |  |  |
| <p>7</p>               |  |  |  |
| <p>Co-crystallized</p> |  |  |  |

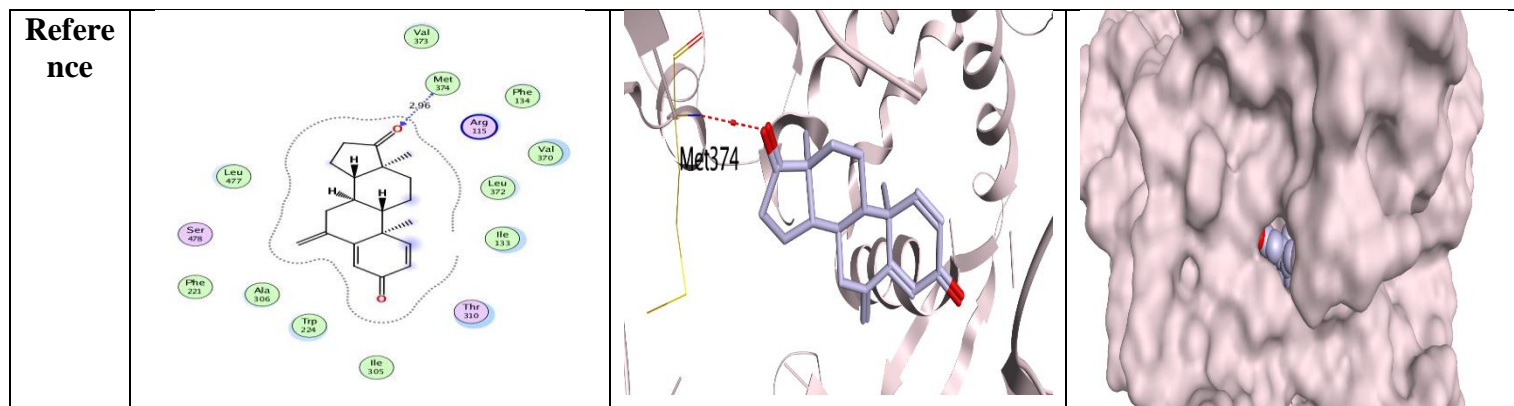

**Figure S5:** the 2D, 3D, and 3D protein positioning of all investigated compound at the biological target, aromatase.

| CA IX    |    |    |            |
|----------|----|----|------------|
| Comp no. | 2D | 3D | 3D protein |
| 1        |    |    |            |
| 2        |    |    |            |
| 3        |    |    |            |
| 4        |    |    |            |

|                 |                                                                                     |                                                                                      |                                                                                       |
|-----------------|-------------------------------------------------------------------------------------|--------------------------------------------------------------------------------------|---------------------------------------------------------------------------------------|
| 5               | 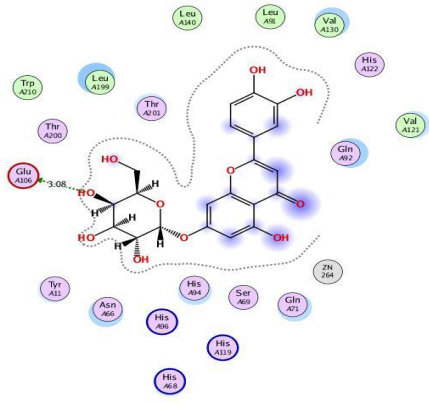   | 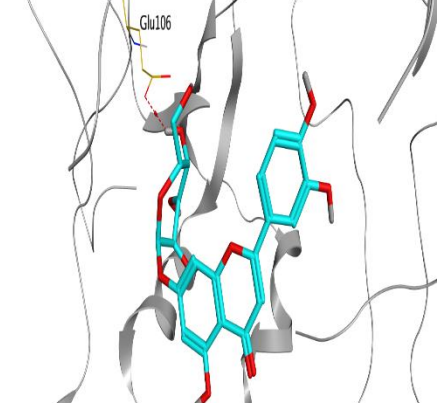   | 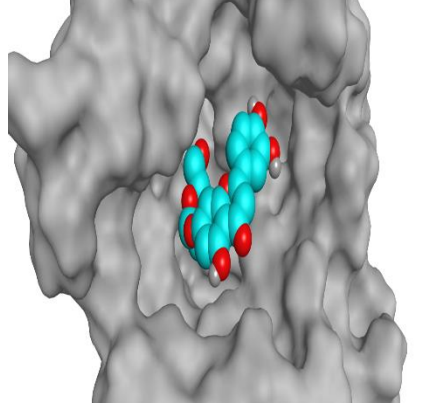   |
| 6               | 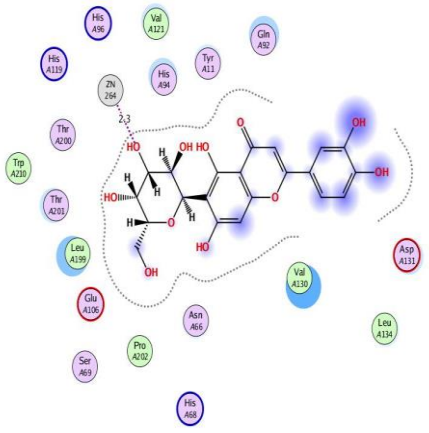   | 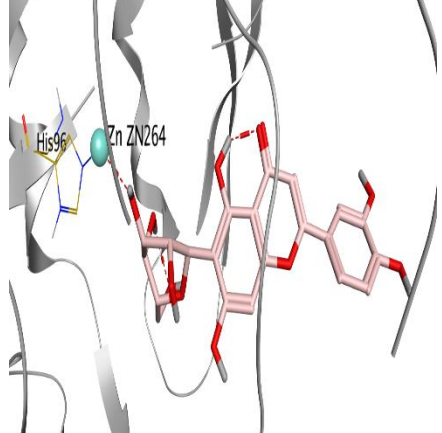   | 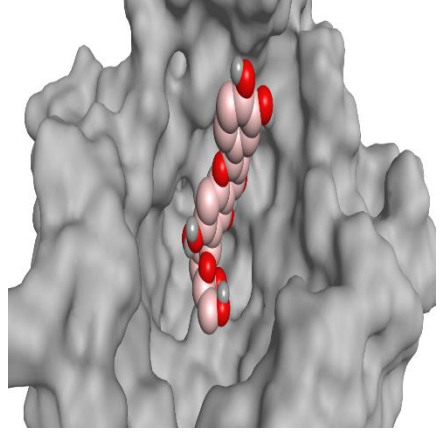   |
| 7               | 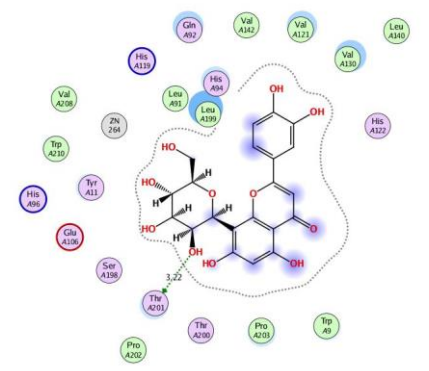 | 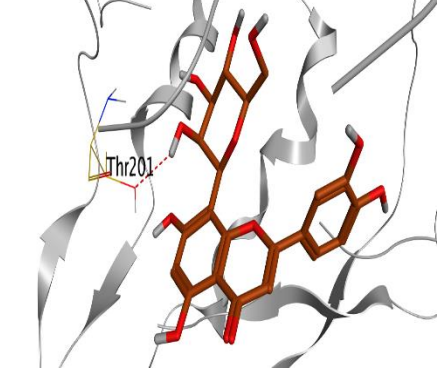 | 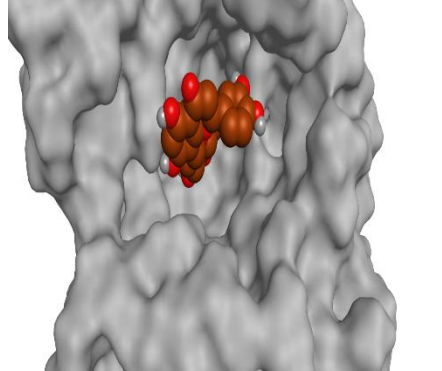 |
| Co-crystallized | 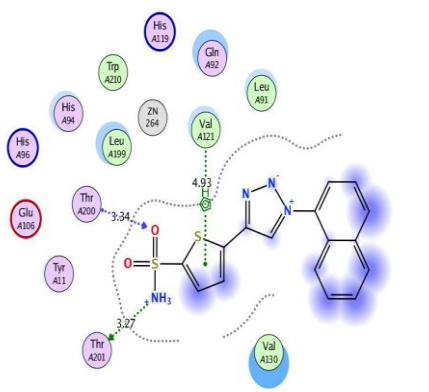 | 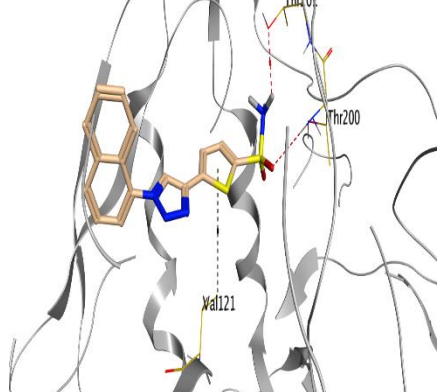 | 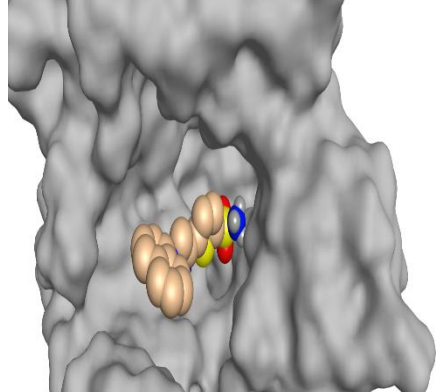 |

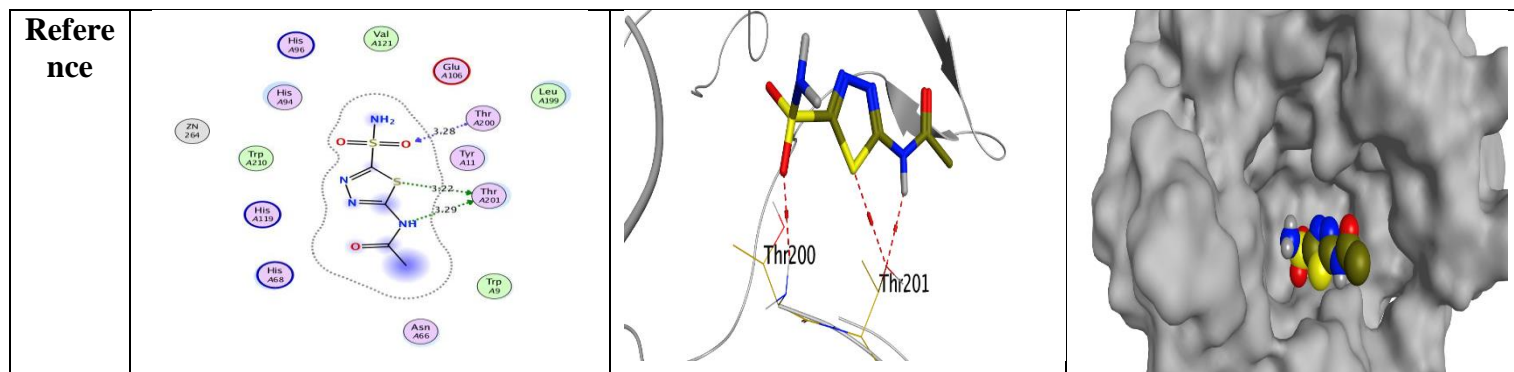

**Figure S6:** the 2D, 3D, and 3D protein positioning of all investigated compound at the biological target, CA IX.

| FAS      |    |    |            |
|----------|----|----|------------|
| Comp no. | 2D | 3D | 3D protein |
| 1        |    |    |            |
| 2        |    |    |            |
| 3        |    |    |            |
| 4        |    |    |            |

|                 |                                                                                     |                                                                                      |                                                                                       |
|-----------------|-------------------------------------------------------------------------------------|--------------------------------------------------------------------------------------|---------------------------------------------------------------------------------------|
| 5               | 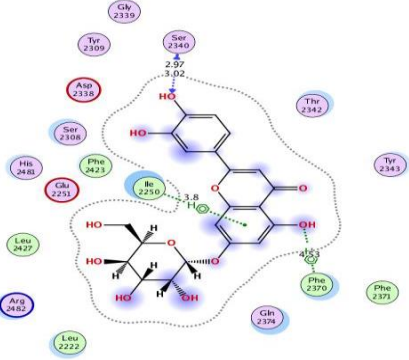   | 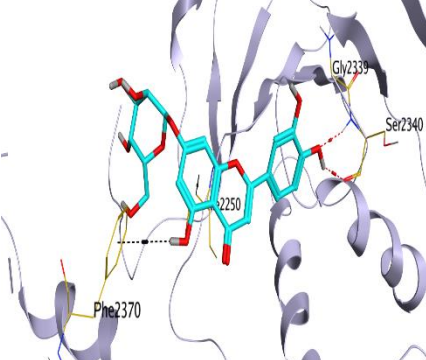   | 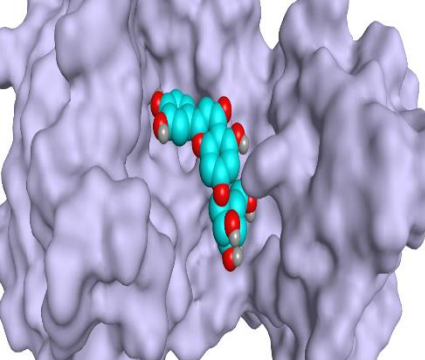   |
| 6               | 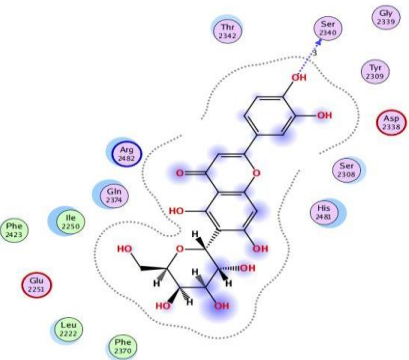   | 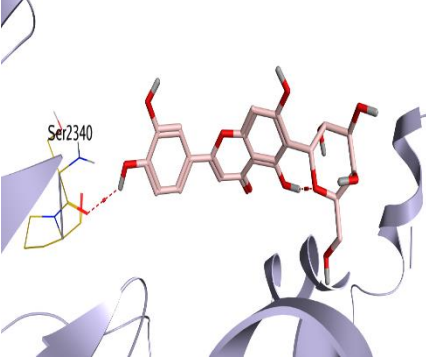   | 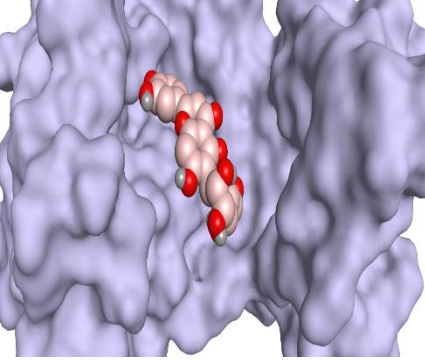   |
| 7               | 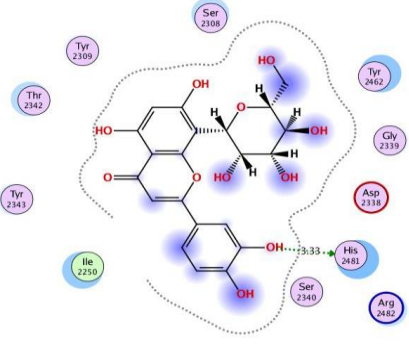  | 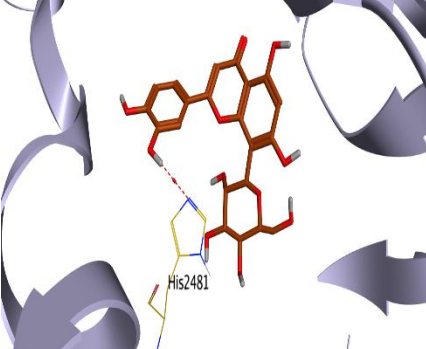  | 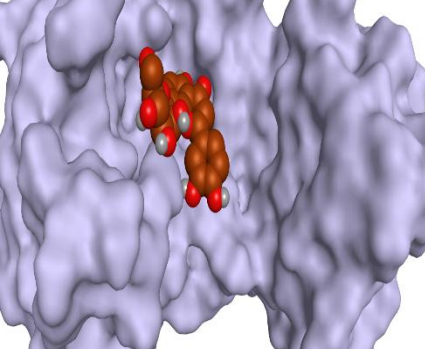  |
| Co-crystallized | 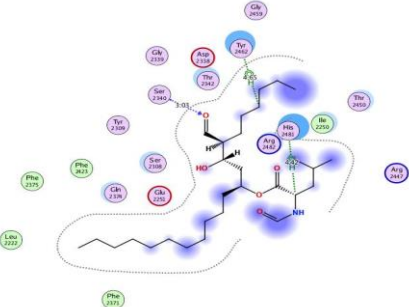 | 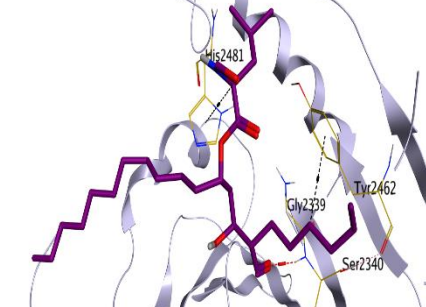 | 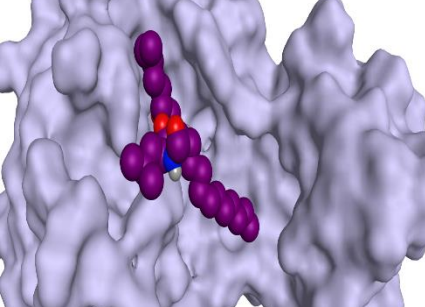 |

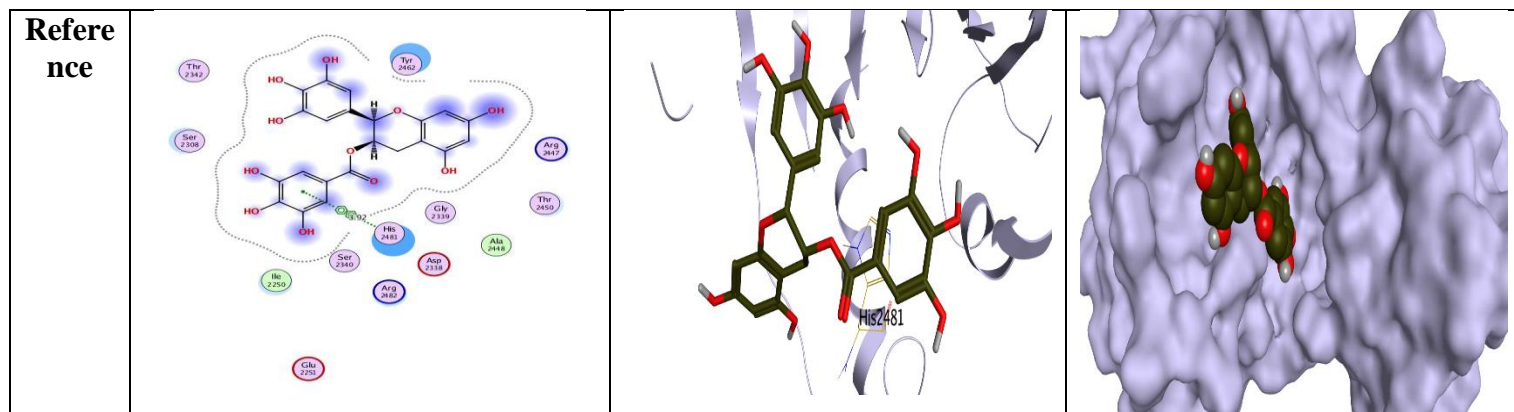

**Figure S7:** the 2D, 3D, and 3D protein positioning of all investigated compound at the biological target, FAS.

| TOP II   |                                                                                                                                                                                                                                                                                                                                           |                                                                                                                                                                                                                               |                                                                                                                                                                                     |
|----------|-------------------------------------------------------------------------------------------------------------------------------------------------------------------------------------------------------------------------------------------------------------------------------------------------------------------------------------------|-------------------------------------------------------------------------------------------------------------------------------------------------------------------------------------------------------------------------------|-------------------------------------------------------------------------------------------------------------------------------------------------------------------------------------|
| Comp no. | 2D                                                                                                                                                                                                                                                                                                                                        | 3D                                                                                                                                                                                                                            | 3D protein                                                                                                                                                                          |
| 1        | 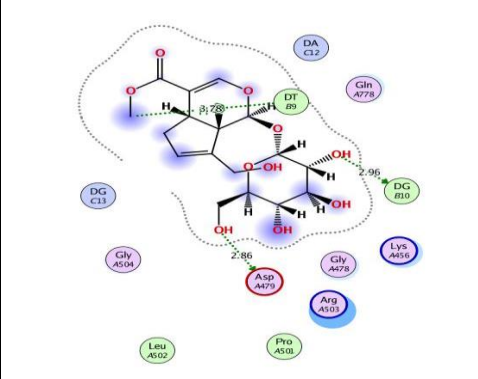 <p>2D chemical structure of compound 1, showing interactions with residues: DA C12, Gln A478, DT B9, DG C11, Lys A455, Gly A478, Arg A501, Pro A508, Leu A502, Asp A479, and Gly A504. Distances are indicated: 3.28, 2.96, 2.86.</p>                   | 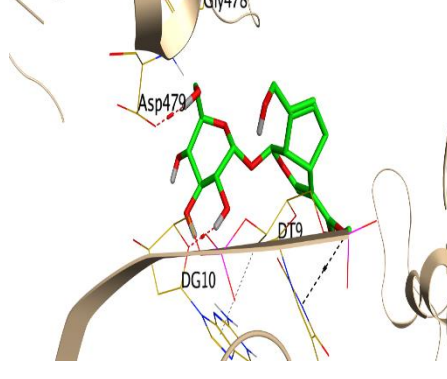 <p>3D ribbon diagram of compound 1 (green sticks) bound to the protein structure. Key residues labeled: Gly478, Asp479, DT9, and DG10.</p> | 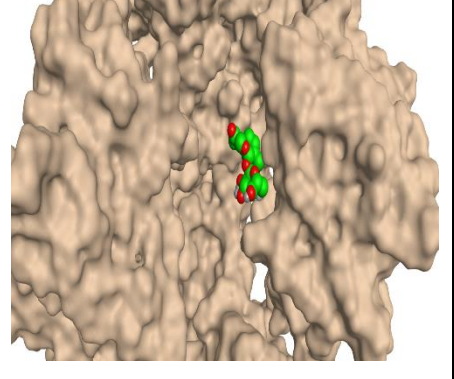 <p>3D surface representation of compound 1 (green and red) bound to the protein surface.</p>    |
| 2        | 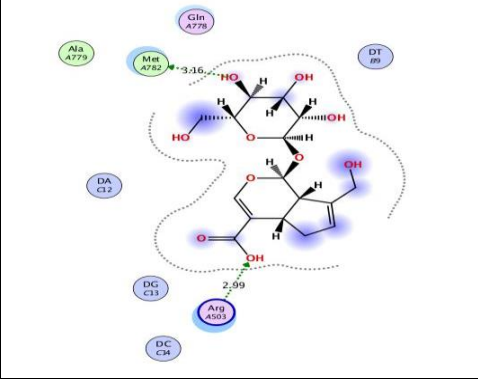 <p>2D chemical structure of compound 2, showing interactions with residues: Gln A478, Met A782, DT B9, DA C12, DG C11, Arg A501, DC C4, and Ala A479. Distances are indicated: 3.16, 2.99.</p>                                                          | 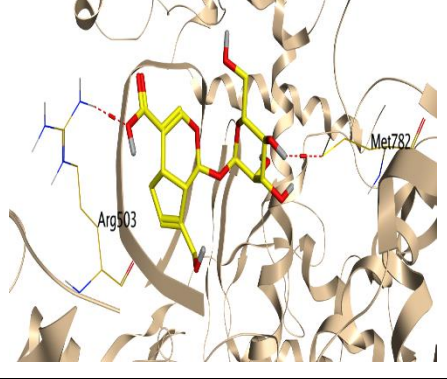 <p>3D ribbon diagram of compound 2 (yellow sticks) bound to the protein structure. Key residues labeled: Arg503 and Met782.</p>            | 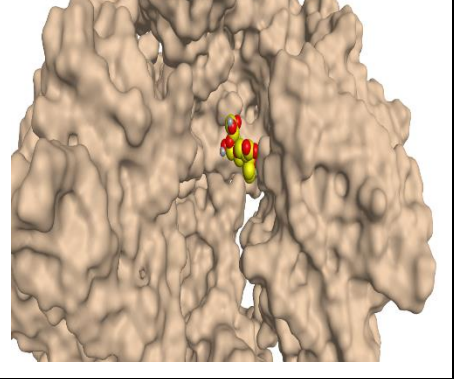 <p>3D surface representation of compound 2 (yellow and red) bound to the protein surface.</p>   |
| 3        | 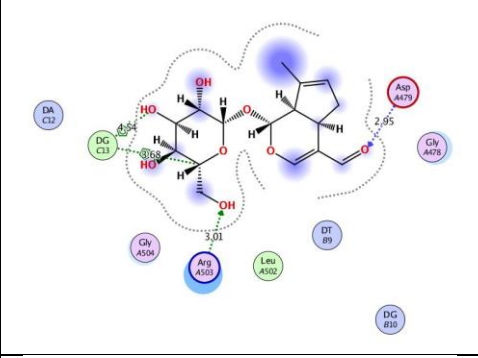 <p>2D chemical structure of compound 3, showing interactions with residues: DA C12, DG C11, Gly A504, Arg A501, Leu A502, Asp A479, Gly A478, DT B9, and DG B10. Distances are indicated: 3.95, 3.01.</p>                                             | 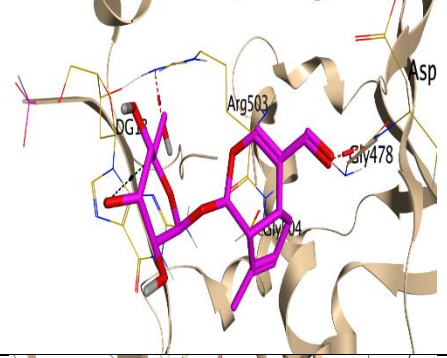 <p>3D ribbon diagram of compound 3 (purple sticks) bound to the protein structure. Key residues labeled: Arg503, Gly478, and Asp.</p>    | 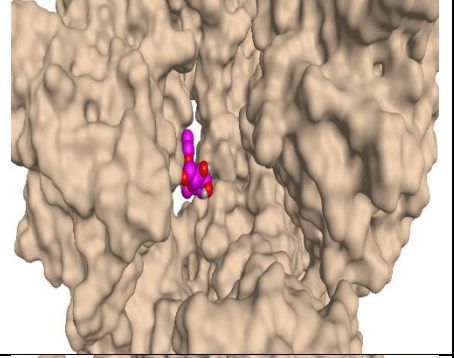 <p>3D surface representation of compound 3 (purple and red) bound to the protein surface.</p> |
| 4        | 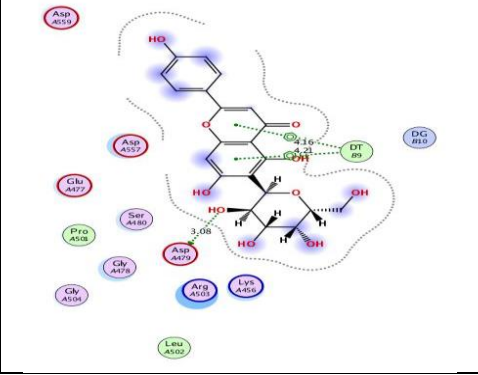 <p>2D chemical structure of compound 4, showing interactions with residues: Asp A559, Asp A555, Gln A477, Ser A480, Pro A505, Gly A478, Asp A479, Gly A504, Arg A501, Lys A465, Leu A502, DT B9, and DG B10. Distances are indicated: 3.16, 3.08.</p> | 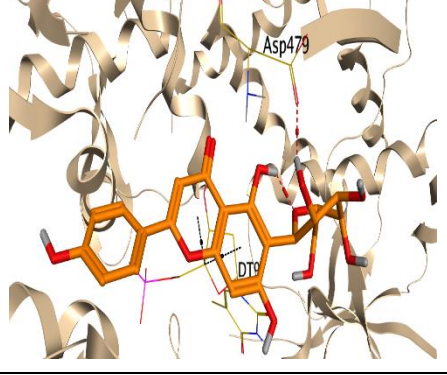 <p>3D ribbon diagram of compound 4 (orange sticks) bound to the protein structure. Key residues labeled: Asp479 and DT9.</p>             | 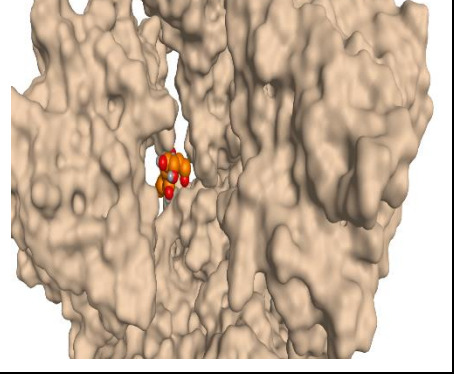 <p>3D surface representation of compound 4 (orange and red) bound to the protein surface.</p> |

|                        |  |  |  |
|------------------------|--|--|--|
| <p>5</p>               |  |  |  |
| <p>6</p>               |  |  |  |
| <p>7</p>               |  |  |  |
| <p>Co-crystallized</p> |  |  |  |

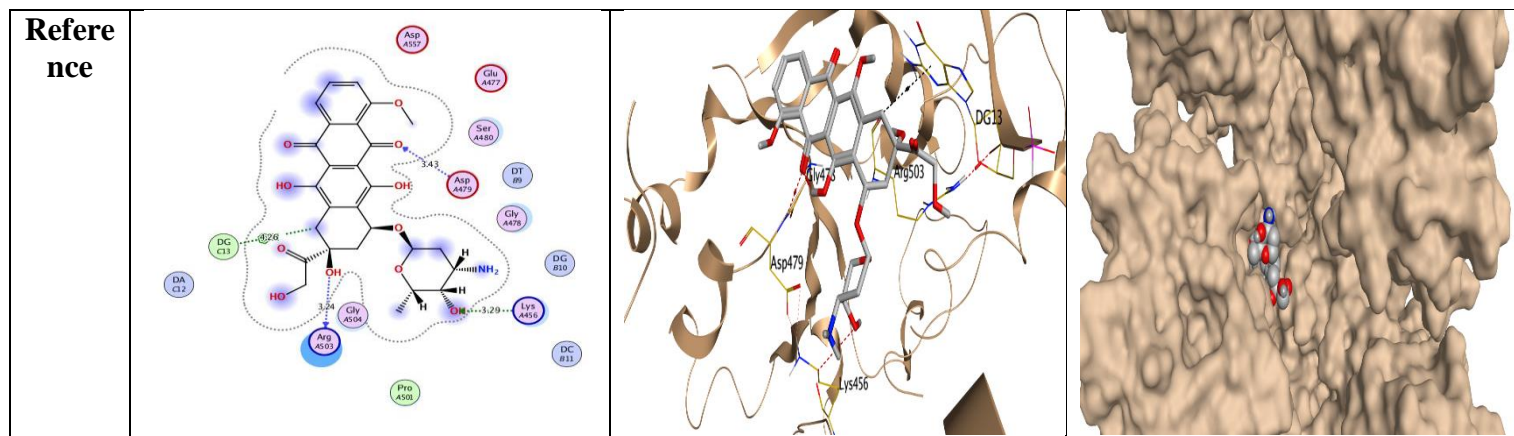

**Figure S8:** the 2D, 3D, and 3D protein positioning of all investigated compound at the biological target, TOP II.
